## **Harnessing the central dogma for stringent multi-level control of gene expression**

F. Veronica Greco<sup>1</sup>, Claire S. Grierson<sup>1,2</sup> and Thomas E. Gorochowski<sup>1,2,\*</sup>

<sup>1</sup> School of Biological Sciences, University of Bristol, Tyndall Avenue, Bristol BS8 1TQ, UK

<sup>2</sup> BrisSynBio, University of Bristol, Tyndall Avenue, Bristol BS8 1TQ, UK

\* Correspondence should be addressed to T.E.G. ([thomas.gorochowski@bristol.ac.uk](mailto:thomas.gorochowski@bristol.ac.uk))

**Keywords:** gene expression; transcription; translation; genetic circuit; synthetic biology; regulatory motif; feed forward loop; control.

## 1 **Abstract**

2 Strictly controlled inducible gene expression is crucial when engineering biological systems  
3 where even tiny amounts of a protein have a large impact on function or host cell viability. In  
4 these cases, leaky protein production must be avoided at all costs. Here, we demonstrate how  
5 the central dogma offers a simple way to effectively address this challenge. By simultaneously  
6 regulating both transcriptional and translational levels, we show how basal expression of an  
7 inducible system can be reduced to virtually undetectable levels, with minimal impact on the  
8 maximum induced expression rate achieved. Using this approach, we create several stringent  
9 expression systems displaying >1000-fold change in their output after induction. Furthermore,  
10 we find that multi-level regulation is able to suppress transcriptional noise and create a digital-  
11 like switch when transitioning between 'on' and 'off' states. This work provides foundational  
12 knowledge and a genetic toolkit of parts to create multi-level gene expression controllers for  
13 those working with toxic genes or requiring precise regulation and propagation of cellular  
14 signals. It also demonstrates the value of exploring more complex and diverse regulatory  
15 designs for synthetic biology.

## 16 Introduction

17 Since the development of the first inducible systems in the early 1980s (de Boer et al., 1983),  
18 the ability to dynamically control gene expression through the use of small molecules  
19 (Gallivan, 2007), light (Baumschlager et al., 2017; Castillo-Hair et al., 2019), and other signals  
20 (Sen et al., 2017) has revolutionized biotechnology. From controlling shifts between cell  
21 growth and protein production stages during large-scale fermentations (Sivashanmugam et  
22 al., 2009), to the detailed characterization of genetic parts and circuitry (Olson et al., 2014),  
23 the control of gene expression underpins a huge variety of applications. However, while  
24 switching expression of a gene 'on' or 'off' is conceptually simple, it is rare for genes to have  
25 such discrete states or ever be completely silenced. Stochastic effects (Elowitz et al., 2002;  
26 Raj and van Oudenaarden, 2008) and leaky expression are widespread and potentially  
27 important for adaptation in natural systems but can wreak havoc in engineered systems where  
28 genes are toxic to a host or responses are highly sensitive and easily triggered by mistake  
29 (Rosano and Ceccarelli, 2014; Süel et al., 2006).

30 Early systems for controlling gene expression relied on the repurposing of native  
31 regulatory components such as transcription factors. One of the most widely used is the  $P_{tac}$   
32 system (de Boer et al., 1983). This consists of a constitutively expressed LacI repressor that  
33 can form dimers and tetramers to strongly bind operator sites within a  $P_{tac}$  promoter sequence  
34 and sterically block initiation of RNA polymerase (RNAP). LacI is sensitive to Isopropyl  $\beta$ -d-1-  
35 thiogalactopyranoside (IPTG) and at high concentrations, the DNA binding activity of LacI is  
36 abolished. This lifts repression of  $P_{tac}$  and leads to strong transcription of genes regulated by  
37 this promoter. While in most cases such systems offer strong repression, because such  
38 regulatory systems focus on a single step during protein synthesis (i.e. transcription), they are  
39 vulnerable to fluctuations in regulator production and the stochastic nature of biochemical  
40 reactions during gene expression (Raj and van Oudenaarden, 2008).

41 Over the past decade, synthetic biologists have developed more advanced methods  
42 to control gene expression. These include engineered regulators based on DNA binding  
43 proteins such as zinc fingers (Khalil et al., 2012), TALENs (Deng et al., 2014) and CRISPRi  
44 (Gilbert et al., 2014), RNA-RNA interactions (Bartoli et al., 2020; Chappell et al., 2017; Green  
45 et al., 2014), post-transcriptional/translational processes such as RNA and protein  
46 degradation (Cameron and Collins, 2014), as well as using directed evolution to optimize  
47 existing inducible systems (Meyer et al., 2019). This offers a wealth of options to more strictly  
48 regulate gene expression through the coupling of multiple forms of regulation (e.g. affecting  
49 both transcription and translation of a gene) to reduce unwanted expression and improve the  
50 robustness of a system to component failure. However, few examples of such multi-level  
51 regulation have been implemented to date (Westbrook and Lucks, 2017). This has resulted in

52 an unclear picture of how best stringent multi-level control can be achieved and the trade-offs  
53 that exist between performance, regulatory complexity, and cellular burden when  
54 designing these systems.

55 Here, we address this problem by systematically studying the combined use of  
56 transcriptional and translational regulators to stringently control protein expression. Using a  
57 combination of mathematical modelling and a combinatorial genetic assembly method, we are  
58 able to design, build and test a variety of synthetic multi-level controllers (MLCs) and elucidate  
59 the relative performance of each. These controllers all implement a coherent type 1 feed-  
60 forward loop (C1-FFL) regulatory motif (**Figure 1A**) that is commonly found in natural genetic  
61 systems and is known to enable more stringent control of an output but is rarely used when  
62 designing new expression systems (Mangan and Alon, 2003). We show how MLCs offer  
63 advantages for many applications spanning the stringent control of protein expression to the  
64 accurate propagation of information in a cell (Beal, 2015; Nielsen et al., 2016) and  
65 demonstrate how applying modern synthetic biology tools to even simple regulatory systems  
66 can offer paths towards the precise and reliable control of biological systems.

67

## 68 **Results**

### 69 ***Stringent control of gene expression by harnessing the central dogma***

70 In most synthetic genetic circuits, control of gene expression is achieved through the use of a  
71 single type of regulation (**Figure 1A**), with control of transcription predominantly used. While  
72 this type of single-level control (SLC; **Figure 1B**) is often sufficient for many applications, the  
73 central dogma naturally lends itself to more stringent multi-level regulation where both  
74 transcription and translation are controlled simultaneously by different types of regulator (e.g.  
75 via transcription factors and RNA-based translational switches). Such multi-level control (MLC;  
76 **Figure 1C**) can be generalised by a genetic design that consists of an *L1* gene encoding a  
77 level 1 transcriptional regulator with cognate promoter  $P_{L1}$ , and an *L2* gene encoding a level 2  
78 translational regulator. Both *L2* and the gene of interest (GOI) are separately transcribed by  
79  $P_{L1}$  promoters and the product of *L2* activates translation of the GOI transcript. This MLC  
80 encapsulates a coherent type 1 feed forward loop (C1-FFL) in which both *L1* and *L2* are  
81 necessary for production of the GOI.

82 To explore the possible benefits of this regulatory motif, we developed mathematical  
83 models to capture how the rate of production of a GOI varied in response to differing  
84 concentrations of an input inducer for both the SLC and MLC designs (**Supplementary Note**  
85 **1; Supplementary Data 1**). We generated steady state response functions by simulating the  
86 models using biologically realistic parameters (**Supplementary Table 1**) over a range of  
87 different input IPTG concentrations. As expected, the output production rate displayed a

88 sigmoidal shape with both controllers reaching near identical maximum rates at high input  
89 IPTG concentrations (**Figure 1D**). The main difference was that the MLC design displayed a  
90 50-fold lower output than the direct controller at low IPTG concentrations, leading to  
91 significantly reduced basal expression when no input was present (**Figure 1D**). This caused  
92 the MLC design to have both an increased dynamic range and fold-change between ‘off’ and  
93 ‘on’ states when compared to the SLC design.

94 We also simulated the output protein production rate for both models when exposed  
95 to a range of dynamic inputs. These included delta functions, as well as pulse and step inputs  
96 (**Figure 1E**). Simulations showed that both types of controller displayed virtually identical  
97 output responses for both the pulse and step inputs, with only a small reduction in output  
98 expression rate for the MLC that matched its lower basal expression level. However,  
99 significant differences were observed in the responses to the delta function input. While the  
100 SLC led to moderate sized pulses in output, the MLC design fully suppressed all output activity  
101 with only tiny fluctuations in the output expression rate observed. The behaviour of the MLC  
102 arose from the need for both  $L1$  and  $L2$  to be expressed to sufficiently high levels for  
103 expression of the GOI to be triggered. The short pulses of expression caused by the delta  
104 function input were insufficient to cause this switch and allowed the MLC to effectively filter  
105 out these transient events in its input.

106 The ability to filter out rapid fluctuations is particularly important for stringent control in  
107 systems where input promoters exhibit high levels of intrinsic noise. In such scenarios, protein  
108 levels can vary significantly across a population of cells (Elowitz et al., 2002) due to the often  
109 bursty nature of gene transcription. This is commonly seen for weak promoters where intrinsic  
110 noise dominates. Rather than the activity of a weak promoter being uniformly low, it instead  
111 displays short bursts of strong activity separated by long periods of inactivity (Elowitz et al.,  
112 2002; Golding et al., 2005). Across a population this averages out to a low overall expression  
113 level, but large variability is present between cells. As seen for the delta function inputs, such  
114 input profiles driving the SLC will lead to large fluctuations in the output. However, because  
115 intrinsic promoter noise is specific to an individual promoter and uncorrelated between multiple  
116 identical versions of a promoter within a construct, the MLC design which contains two copies  
117 of the input promoter  $P_{L1}$  should find that a burst of expression from one  $P_{L1}$  promoter is highly  
118 unlikely to occur at the same time as a burst from the other. Therefore, the MLC will suppress  
119 noise in the output.

120 To test this hypothesis, we generated accurate time-series promoter activity profiles  
121 based on a two-state model (Golding et al., 2005) where the mean length of time a promoter  
122 was in an ‘on’ active and ‘off’ silent state ( $\Delta t_{\text{ON}}$  and  $\Delta t_{\text{OFF}}$ , respectively) were  $\langle \Delta t_{\text{ON}} \rangle = 6$  min and  
123  $\langle \Delta t_{\text{OFF}} \rangle = 37$  min. These values were taken from previous experimental measurements in *E.*  
124 *coli* (Golding et al., 2005). We also set the activity of the  $P_{L1}$  promoter when in an ‘on’ state to

125 a biologically realistic 0.25 RNAP/min. Independent time-series were generated for each  $P_{L1}$   
126 promoter in the MLC and only one of these was used for the SLC where only a single  $P_{L1}$   
127 promoter is present. These profiles were then fed into our existing dynamic models and the  
128 responses of the systems simulated. We found that the output production rate for the SLC  
129 saw large increases, especially where the input consisted of longer bursts of activity or several  
130 bursts in short succession (**Figure 1F**). In comparison, the MLC fully suppressed all output  
131 production making it an excellent filter of intrinsic promoter noise.

132

### 133 ***A genetic template to explore multi-level gene regulation***

134 There are many ways that an MLC could be implemented biologically. Furthermore, when  
135 implementing such a controller it is often necessary to switch the input that is used and internal  
136 regulators such that multiple controllers can be used simultaneously within the same cell. To  
137 meet these requirements, we developed an 8-part genetic template and toolkit of parts to allow  
138 for the rapid combinatorial assembly of MLCs (**Figure 2A**). The design enables both single  
139 and multi-level regulation, has the option to introduce protein tags for further post-translational  
140 control of the GOI (e.g. through signalled degradation) and is structured to minimise the  
141 chance for transcriptional readthrough to cause unwanted expression of the component parts.  
142 The toolkit comprises of 8 types of part plasmid (pA–pH) and a backbone plasmid (pMLC-  
143 BB1) in which the final MLC design is inserted (**Supplementary Data 2**). Assembly is  
144 performed using a standard one-pot Golden Gate reaction with individual blocks designed to  
145 use 4 bp overhangs with minimal cross reactivity to ensure the correct and efficient ligation of  
146 parts (Woodruff et al., 2016). Furthermore, rapid screening of successful inserts is enabled by  
147 the drop-out of an orange fluorescent protein (*ofp*) expression unit (Engler et al., 2009)  
148 (**Supplementary Note 2**).

149 Using this toolkit, we aimed to compare the *in vivo* behaviours of different SLC and  
150 MLC designs with a focus on the different mechanisms that could be used for  $L2$  control and  
151 the affect these might have on overall performance. For the SLC design we chose the widely  
152 used  $P_{tac}$  system introduced earlier (**Figure 2C**). To simplify comparisons, we also used the  
153  $P_{tac}$  system for  $L1$  control in all the MLC designs and combined it with three different RNA-  
154 based  $L2$  regulators. These included a toehold switch (THS; **Figure 2D**) (Green et al., 2014,  
155 2017), a small transcription activating RNA (STAR; **Figure 2E**) (Chappell et al., 2015), and a  
156 dual control system (DC; **Figure 2F**) (Westbrook and Lucks, 2017).

157 The THS regulator encodes a structural component followed by a ribosome binding  
158 site (RBS) that is used to drive translation of the GOI (**Figure 2D**). The structural region is  
159 designed to form a strong hairpin loop that when transcribed hinders the ability for ribosomes  
160 to bind the RBS, and thus inhibits translation. Translation is activated by expression of a  
161 complementary small RNA (sRNA) trigger that hybridizes to a short unstructured region of the

162 THS which causes a breakdown in its secondary structure. This conformational change allows  
163 ribosomes to bind the RBS and translation of the GOI to proceed. THSs were selected  
164 because they offer strong repression of translation, can be designed computationally, and  
165 large libraries of designs exist with minimal crosstalk when used together (Green et al., 2014,  
166 2017).

167 Unlike the THS, the STAR regulator works at a transcriptional level. The STAR's target  
168 is placed before an RBS in the 5' untranslated region (UTR) of the GOI (**Figure 2E**). This  
169 forms an intrinsic terminator when transcribed and inhibits GOI expression. Activation is  
170 achieved by expression of the STAR RNA, which interacts with the target, prevents terminator  
171 formation and thus allows for expression of the downstream GOI. Similar to THSs, STARs  
172 have been shown to offer strong repression and there exist large libraries of orthogonal  
173 variants (Chappell et al., 2015, 2017).

174 Finally, the DC regulator combines both transcriptional and translational control by  
175 modifying the pT181 attenuator (Westbrook and Lucks, 2017). The DC target is placed in the  
176 5'-UTR of the GOI and encodes an intrinsic terminator that includes the RBS (**Figure 2F**).  
177 When transcribed, the intrinsic terminator not only halts transcription, but also represses  
178 translation by causing the RBS to form a strong RNA secondary structure making it  
179 inaccessible to the ribosome. Activation is achieved by expression of a STAR, which interacts  
180 with the target, both preventing terminator formation and causing a conformational change in  
181 the RNA structure that makes the RBS accessible for translation initiation. The DC regulator  
182 was chosen due to this combined regulatory action which has been shown to produce strong  
183 repression (Westbrook and Lucks, 2017). However, to date, only a single of these regulators  
184 has been created, limiting future applications.

185 DNA encoding parts for each of these regulatory systems was synthesised and our  
186 toolkit used to assemble the SLC and three MLC designs. Superfolder green fluorescent  
187 protein (*gfp*) was chosen as the GOI to allow for the measurement of output expression in  
188 single cells using flow cytometry.

189

### 190 ***Performance comparison of the controllers***

191 To characterise the performances of the controllers, we transformed *Escherichia coli* cells with  
192 each construct and measured GFP fluorescence using flow cytometry for 'off' and 'on' input  
193 states. As  $P_{tac}$  was used as an input for all the designs, this corresponded to growing the cells  
194 in either 0 or 1 mM IPTG, respectively (**Methods**). Data from these experiments was then  
195 used to calculate the dynamic range and fold change in output GFP fluorescence (**Table 1**).

196 We found a clear separation between output states for all designs with little variation  
197 between biological replicates (**Figures 3A**). All MLCs (THS, STAR and DC) reached higher  
198 expression levels than the  $P_{tac}$  SLC, and the THS and DC designs achieved large >1000-fold

199 changes between output states. Notably, while the STAR design reached a much higher ‘on’  
200 state than the  $P_{tac}$  design, the STARs high levels of basal (leaky) expression when no input  
201 was present resulted in a 43% lower fold change (**Table 1**).

202 A challenge when calculating these measures (especially fold change) is the ability to  
203 accurately quantify very low level of output GFP fluorescence, which are near or identical to  
204 the autofluorescence of the cells. To better understand this aspect, we measured the GFP  
205 autofluorescence of untransformed *E. coli* cells, performing 11 biological replicates to estimate  
206 a fluorescence distribution that could be used as an approximate detection limit. Overlaying  
207 the average and standard deviation of the cell autofluorescence onto our results (**Figure 3A**,  
208 dashed line and grey shaded region), we found that the ‘off’ states for the  $P_{tac}$ , THS and DC  
209 designs all fell within this region and very close to the average suggesting they have virtually  
210 no leaky expression at all.

211 While comparisons of average expression levels between ‘on’ and ‘off’ states are  
212 useful, they are not able to capture the role of cell-to-cell variability inherent in all gene  
213 expression (Raj and van Oudenaarden, 2008). Such variation is crucial when assessing the  
214 performance of stringent expression systems because even though average output states  
215 might be sufficiently separated to be distinguished, cell-to-cell variation across a population  
216 can lead to overlaps in the output distributions. Cells falling in this overlap are impossible to  
217 classify resulting in some cells with an undetermined state. Engineers have developed  
218 measures to help characterise the strength and quality of a signal (i.e. the ability to distinguish  
219 ‘on’ and ‘off’ output states) with the Signal to Noise Ratio (SNR) commonly used in other fields  
220 such as electronics. SNR has also recently been adapted for use when studying engineered  
221 genetic systems making it easier to understand how the quality of signals in a circuit are  
222 maintained or degraded as they pass through various genetic devices (Beal, 2015).

223 Using the flow cytometry distributions, we calculated the SNR for each controller in  
224 decibel (dB) units (**Table 1; Methods**). We found that the  $P_{tac}$  SLC performed worst with a low  
225 SNR of 0.2 dB, corresponding to a signal barely larger than the noise. This was evident for  
226 the flow cytometry distributions where a sizable overlap in the ‘on’ and ‘off’ states was seen  
227 (**Figure 3B**). All MLCs performed better with the THS achieving an SNR >10 dB. This  
228 improved performance was also evident from the flow cytometry data with clear gaps of  
229 varying sizes between the ‘on’ and ‘off’ output distributions (**Figure 3B**).

230

### 231 ***Burden of controllers on the host cell***

232 There is a growing awareness of the importance of considering the burden that engineered  
233 genetic parts and circuits place on their host cell (Boo et al., 2019). The introduction of a  
234 genetic construct that sequesters large quantities of shared cellular resources like ribosomes  
235 or heavily impact core metabolic fluxes can lead to reduced growth rates and trigger stress



236 responses that impact the function of engineered genetic parts (Ceroni et al., 2015, 2018;  
237 Goroehowski et al., 2014, 2016; Gyorgy et al., 2015; Weiße et al., 2015). When designing the  
238 MLCs, we purposefully selected RNA-based regulators as they impose a small metabolic  
239 burden on the cell (Kelly et al., 2018). However, to experimentally verify this was the case, we  
240 generated growth curves for all SLC and MLC designs (**Supplementary Figure 1**). Because  
241 the metabolic demands of the controllers would vary based on the concentration of inducer  
242 present (because varying levels of sRNA or STAR are produced), cells were exposed to 4  
243 different IPTG concentrations (0, 0.1, 1, 10 mM) spanning the ‘off’ and ‘on’ states of the  
244 controllers.

245 From these growth curves, we estimated the doubling time during the exponential  
246 growth phase (**Methods**). We found that the SLC and all MLCs displayed similar doubling  
247 times of ~70 min (**Figure 3C**). Furthermore, we saw a slight decrease in the doubling times of  
248 all controllers as the IPTG concentration increased. This trend is counterintuitive given that an  
249 increasing IPTG concentrations will cause expression of the GOI and any *L2* regulators,  
250 increasing the burden on the cell. However, it is known that IPTG can have unexpected effects  
251 on cell physiology (Malakar and Venkatesh, 2012) and cause changes in plasmid stability  
252 (Gomes et al., 2020), which could lead to reduced overall burden due to fewer copies of the  
253 controller plasmid or more efficient utilisation of available nutrients by the cell.

254 We also measured the lag time after inoculation into fresh media before the cells  
255 entered exponential growth (**Methods**). We found differences between many of the controllers  
256 with a lag time of ~165 min for the  $P_{tac}$  and THS designs, a shorter lag time of 88 min for the  
257 DC design, and a significantly longer lag time of 373 min for the STAR design (**Figure 3D**).  
258 Closer inspection of the growth curves showed that the DC design had a consistently higher  
259 initial cell density (optical density at 600 nm of 0.07 compared to 0.04 for the THS design),  
260 which could account for the shorter lag phase (**Supplementary Figure 1**). For the STAR  
261 design the elongated lag phase coincided with a consistently longer additional time of ~100  
262 min to reach saturation of the culture.

263 To better understand if the extended lag phase of the STAR-based MLC was a general  
264 feature to be expected when using this type of regulator, we rebuilt this construct using a  
265 different STAR (STAR<sub>2</sub>) that had an identical initial 72 bp sequence, but unique 10 bp  
266 sequence at its 3'-end (**Supplementary Table 2**). As we would expect for such a similar  
267 design, testing of the STAR<sub>2</sub> construct showed similar performance to the initial STAR design  
268 with a good dynamic range and similar leaky expression in its output (**Table 1**;  
269 **Supplementary Figure 2; Methods**). However, unlike the original, the STAR<sub>2</sub> design  
270 displayed a lag phase (161 min) and doubling time (72 min) that closely matched the other  
271 MLCs. This suggests that long lag times observed for the original STAR design were likely

272 due to some highly specific and uncharacterised off-target interactions with endogenous  
273 cellular processes and not due to a general feature of the STAR's regulatory mechanism.

274

### 275 ***Digital-like transitions and suppression of weak input signals***

276 Our previous modelling of the MLCs showed that in addition to improved performance in 'on'  
277 and 'off' states, the addition of the *L2* regulator also altered the response function, causing a  
278 sharper transition from an 'off' to 'on' state due to the lower basal expression, and an ability to  
279 suppress low level noise in the input (**Figure 1D, E**).

280 To assess if these features were present, we generated response functions of the  
281 controllers by growing the cells in varying concentrations of input inducer and measuring  
282 steady state output GFP fluorescence. The sharpness of the transition is captured by the  
283 cooperativity of Hill function fits to this data. We found that in comparison to the  $P_{tac}$  SLC, both  
284 the THS and STAR MLCs saw more than a doubling in its value from 3.4 to more than 7, while  
285 the DC design maintained an identical value (**Table 1**). High cooperativities correspond to a  
286 very sharp step-like transition between 'on' and 'off' states that is clearly evident from the  
287 response function curves (**Figure 4A**). The high non-linearity in the response functions of the  
288 THS and STAR MLCs is potentially useful for information processing tasks. In particular,  
289 implementing digital logic within cells requires clear 'on' and 'off' states and limited chance for  
290 signals to reside at intermediate states. Sharp transitions in the response function ensure that  
291 there is less room for an input to fall at an intermediate point during the transition, ensuring an  
292 'on' or 'off' state is always given. Furthermore, a high non-linearity can also be exploited to  
293 generate bimodality. For example, if a noisy input is positioned to span the transition point in  
294 the response function, a population of cells will have large groups of cells in 'on' and 'off'  
295 states, with much fewer in intermediate states because of the sharp transition and small  
296 probability of falling in this small region.

297 To quantify the ability of each MLC to suppress low level input noise, we further  
298 analysed the response functions. A difficulty when comparing the response functions is the  
299 large differences observed in the dynamic range of each design. Given that the promoter  
300 driving transcription for each MLC is identical ( $P_{tac}$ ), this discrepancy comes from differing *gfp*  
301 translation rates controlled by the associated ribosome binding site. These do differ in  
302 sequence and strength for each design and in some cases are specific and integral to the  
303 RNA regulator's function. Therefore, to allow for comparisons, we normalised the output of  
304 each MLC to its maximum output and used data from the  $P_{tac}$  SLC to estimate the input activity  
305 of the  $P_{tac}$  promoter used in each controller. If no secondary regulation was present (as in the  
306 SLC), then we would expect the normalised input and output to follow a straight line where  
307 one equals the other (see  $P_{tac}$  design in **Figure 4B**). However, if the secondary regulation

308 suppresses the input  $P_{tac}$  activity then a lower normalised output to input will be seen, and  
309 conversely, an amplification of the input will lead to a higher normalised output to input.

310 Using this approach, we assessed the responses of each MLC and found that all  
311 caused a suppression of low levels of input promoter activity, while an amplification of higher  
312 input activities. This effect was most prominent for the THS and STAR designs, with both able  
313 to ensure controller output is maintained below 1% even when the input promoter reaches  
314 3.5% activity (**Figure 4B**, insert). These results confirm the findings of our modelling and  
315 demonstrate the potential for using MLCs to filter out unwanted input activity in noisy  
316 environments.

317

## 318 **Discussion**

319 In this work we have shown how multi-level control of gene expression offers a means to more  
320 stringently regulate gene expression. By harnessing the multi-step process of transcription  
321 and translation that underpins the central dogma of biology and simultaneously regulating both  
322 processes in response to an input signal, we demonstrate through modelling (**Figure 1**) and  
323 experiments (**Figures 2 and 3**) how inducible expression systems can be created with virtually  
324 undetectable leaky expression when in an 'off' state, while also maintaining high expression  
325 rates once induced. Furthermore, we have shown that multi-level regulation creates a more  
326 digital-like switch when transitioning between 'off' and 'on' states and suppresses low-level  
327 transcriptional noise (**Figure 4**), both of which are valuable properties when developing  
328 genetic systems for information processing or when highly toxic products or excitable systems  
329 act as downstream products.

330 Our top MLC design, which makes use of a THS for  $L2$  regulation, achieved >2000-  
331 fold change in output upon induction and displayed a 10 dB SNR (**Table 1**) making it one of  
332 the most tightly controlled and high-performance induction systems built to date. Furthermore,  
333 the flexibility of our modular genetic toolkit for assembling new multi-level controllers (**Figure**  
334 **2**), and the availability of many other THSs, makes it easy to develop additional orthogonal  
335 MLCs that could be used in parallel within the same cell. It is worth noting that the underlying  
336  $P_{tac}$  promoter that the THS MLC uses, achieved only a 93-fold change and 0.2 dB SNR when  
337 used alone as an SLC. Therefore, employing the multi-level regulatory approach outlined in  
338 this work could offer a means to greatly improve the performance of many existing low-  
339 performance transcriptional sensors, without any need to modify the transcription factors or  
340 promoter sequences making up these devices.

341 With the improvements we see when employing multi-level regulation, it is likely no  
342 coincidence that small interfering RNAs (siRNAs) are also widely used by bacteria to refine  
343 the regulation of many endogenous processes (Gottesman, 2005; Storz et al., 2004; Waters

344 and Storz, 2009). RNAs are perfectly tailored for this task, imposing a small metabolic burden  
345 and offering a fast response. In this work, we selected synthetic RNA-based regulators that  
346 function through RNA-RNA hybridisation alone. While this reduces our dependencies on other  
347 cellular machinery and makes them easier to transfer between strains/organisms, it is known  
348 that many endogenous siRNA regulators employ protein chaperones such as Hfq to increase  
349 their binding affinity to targets and strengthen their regulatory effect (Soper et al., 2010). It  
350 would be interesting to explore the use of synthetic regulators that make use of these  
351 chaperones (Kelly et al., 2018) or exploit recent advances in the RNA part design (Chappell  
352 et al., 2017) to see whether further improvements in performance are possible.

353 The stringent regulation of our controllers is achieved by incorporating a C1-FFL  
354 regulatory motif that is known to be evolutionarily selected in many natural and engineered  
355 systems (Milo et al., 2002) and can be used to implement many useful functionalities (Mangan  
356 and Alon, 2003). More recent work has also demonstrated the importance of interconnections  
357 and clustering of many motifs in coordinating more complex behaviours (Gorochowski et al.,  
358 2018; S. Dunn et al., 2019). While this work focused on demonstrating that transcriptional and  
359 translational regulation can fit neatly into a C1-FFL structure, an intriguing future direction  
360 would be to explore how these higher-level structures (e.g. motif clusters or higher-level  
361 network structures) might be implemented using the approaches outlined in this work to aid  
362 the coordination of multiple interrelated processes in parallel.

363 This study started with the goal of more stringently controlling gene expression.  
364 However, through the design of our MLCs it became evident that the more intricate regulatory  
365 designs we built had many other benefits. Synthetic biology to date has often focused on  
366 simplifying complexity and reducing systems to their minimal parts. Our findings indicate that  
367 complementary studies exploring the complexification of synthetic regulatory systems might  
368 also reap rewards allowing us to more efficiently exploit the capabilities of biology by  
369 combining many diverse processes and parts in unison. The genetic toolkit presented here  
370 offers a starting point for such studies focused on the fundamental processes of transcription  
371 and translation.

372

## 373 **Methods**

### 374 ***Strains, media and chemicals***

375 All cloning and characterization of genetic constructs was performed using *Escherichia coli*  
376 strain DH10- $\beta$  ( $\Delta$ (ara-leu) 7697 araD139 fhuA  $\Delta$ lacX74 galK16 galE15 e14-  $\phi$ 80dlacZ $\Delta$ M15  
377 recA1 relA1 endA1 nupG rpsL (StrR) rph spoT1  $\Delta$ (mrr-hsdRMS-mcrBC) (New England  
378 Biolabs, C3019I). Cells were grown in DH10- $\beta$  outgrowth medium (New England Biolabs,  
379 B9035S) for transformation, LB broth (Sigma-Aldrich, L3522) for general propagation, and M9

380 minimal media supplemented with glucose (6.78 g/L Na<sub>2</sub>HPO<sub>4</sub>, 3 g/L KH<sub>2</sub>PO<sub>4</sub>, 1 g/L NH<sub>4</sub>Cl,  
381 0.5 g/L NaCl (Sigma-Aldrich, M6030), 0.34 g/L thiamine hydrochloride (Sigma T4625), 0.4%  
382 D-glucose (Sigma-Aldrich, G7528), 0.2% casamino acids (Acros, AC61204-5000), 2 mM  
383 MgSO<sub>4</sub> (Acros, 213115000), and 0.1 mM CaCl<sub>2</sub> (Sigma-Aldrich, C8106)) for characterization  
384 experiments. Antibiotic selection was performed using 100 µg/mL ampicillin (Sigma-Aldrich,  
385 A9518) and 50 µg/mL kanamycin (Sigma-Aldrich, K1637). Induction of the expression systems  
386 was performed using varying concentrations of isopropyl β-D-1-thiogalactopyranoside (IPTG)  
387 (Sigma-Aldrich, I6758).

388

### 389 ***Assembly of controllers***

390 All part plasmids were either directly synthesised (GeneArt, Thermo Fisher Scientific) or  
391 assembled as complementary single-stranded DNA oligos annealed together. Controllers  
392 consisting of 8-parts (pA–pH) plus a backbone (pMLC-BB1) were assembled using a standard  
393 Golden-Gate cloning method (**Figure 2B**) (Engler et al., 2009). Briefly, for each assembly, we  
394 started from the 18.5 ng of required part plasmids (pA–pH) and 18.5 ng of the backbone  
395 (pMLC-BB1) to be added to a 5 µL Golden-Gate reaction. The standard manufacturer's  
396 reaction conditions were used, but at a quarter of their normal volume (New England Biolabs,  
397 E1601). 2 µL of this reaction mix was then used to transform 12.5 µL of chemically competent  
398 DH10-β cells (New England Biolabs, C3019) for further experiments. All assembled constructs  
399 were sequence verified by Sanger sequencing (Eurofins Genomics). Annotated sequences of  
400 all part and backbone plasmids and assembled controllers are provided in GenBank format in  
401 **Supplementary Data 2**.

402

### 403 ***Characterisation experiments***

404 Single colonies of cells transformed with an appropriate genetic construct were inoculated in  
405 200 µL M9 media supplemented with glucose and kanamycin for selection in a 96-well  
406 microtiter plate (Thermo Fisher Scientific, 249952). Cultures were grown for 14 hours in a  
407 shaking incubator (Stuart, S1505) at 37 °C and 1250 rpm. Following this, the cultures were  
408 diluted 3:40 (15 µL in 185 µL) in M9 media supplemented with glucose, kanamycin for  
409 selection and IPTG for induction in a new 96-well microtiter plate and grown for a further 4  
410 hours under the same conditions. Finally, the cultures were further diluted 1:10 (10 µL into 90  
411 µL) in phosphate-buffered saline (PBS) (Gibco, 18912-014) containing 2 mg/mL kanamycin to  
412 halt protein translation. These samples were incubated at room temperature for 1 hour to allow  
413 for full maturation of GFP before flow cytometry was performed.

414

### 415 ***Flow cytometry***

416 Measurements of GFP fluorescence in single cells was performed using an Acea Biosciences  
417 NovoCyte 3000 flow cytometer equipped with a NovoSampler to allow for automated collection  
418 of samples from a 96-well microtiter plate. Data collection was performed using the  
419 NovoExpress software. Cells were excited using a 488 nm laser and GFP fluorescence  
420 measurements taken using a 530 nm detector. At least  $10^6$  events were captured per sample.  
421 In addition, to enable conversion of GFP fluorescence into calibrated MEFL units (Castillo-  
422 Hair et al., 2016) a single well per plate contained 15  $\mu$ L of 8-peak Rainbow Calibration  
423 Particles (Spherotech, RCP-30-5A) diluted into 200  $\mu$ L PBS. Automated gating of events and  
424 conversion of GFP fluorescence into MEFL units was performed using the forward (FSC) and  
425 side scatter (SSC) channels and the FlowCal Python package version 1.2.2 with default  
426 parameters (Castillo-Hair et al., 2016). To correct for the GFP autofluorescence of cells, *E.*  
427 *coli* DH10- $\beta$  cells containing no genetic construct were grown in identical conditions. An  
428 average measurement of GFP fluorescence in MEFL units from three biological replicates of  
429 these cells was then subtracted from fluorescence measurements of cells containing our  
430 genetic constructs to correct for cell autofluorescence.

431

#### 432 **Plate reader measurements**

433 Single colonies of cells transformed with an appropriate genetic construct were inoculated in  
434 200  $\mu$ L M9 media supplemented with glucose and kanamycin for selection in a 96-well  
435 microtiter plate (Thermo Fisher Scientific, 249952). Cultures were grown for 4 hours in a  
436 shaking incubator (Stuart, S1505) at 37 °C and 1250 rpm. Following this, the cultures were  
437 diluted 3:40 (15  $\mu$ L in 185  $\mu$ L) in M9 media supplemented with glucose, kanamycin for  
438 selection and IPTG for induction in a 96-well 190  $\mu$ m clear base imaging microplate (4titude,  
439 Vision Plate™, 4ti-0223). This spectrophotometric assay was performed using a BioTek  
440 Synergy Neo2 plate reader at 37°C. Optical density at 600 nm ( $OD_{600}$ ) was measured every  
441 10 min over a 16-hour period.  $OD_{600}$  measurements were also taken from samples of M9  
442 medium supplemented with glucose containing no cells to allow for quantification of media  
443 autofluorescence. Shaking was automated for the all the length of the experiment. Data  
444 collection was performed using the Gen5 version 3.04 software. For each time point, media  
445 autofluorescence was subtracted from the sample measurement.

446

#### 447 **Signal to noise ratio**

448 The signal to noise ratio (SNR) in decibel (dB) units was calculated from the flow cytometry  
449 GFP fluorescence distributions using the equation (Beal, 2015)

$$450 \text{SNR}_{\text{dB}} = 20 \cdot \log_{10} \frac{|\log_{10}(\mu_{\text{ON}}/\mu_{\text{OFF}})|}{2 \cdot \log_{10}(\sigma)}. \quad (8)$$

451 Here,  $\mu_{\text{ON}}$  and  $\mu_{\text{OFF}}$  are the geometric means of distributions for the ON and OFF states,  
452 respectively, and  $\sigma$  is the geometric standard deviation of the distribution for the OFF state.  
453 OFF and ON states correspond to cells grown in 0 and 1 mM IPTG, respectively.

454

#### 455 **Data analysis and numerical simulation**

456 Data analysis was performed using Python version 3.7.4 and the NumPy version 1.17.4, SciPy  
457 version 1.3.1, Pandas version 1.0.3, FlowCal version 1.2.2, and Matplotlib version 3.1.1  
458 libraries. ODE models were simulated using the odeint function of the SciPy.integrate Python  
459 package version 1.1 with default parameters. Steady-state response functions of the  
460 controllers were calculated by fitting median GFP fluorescence values from the flow cytometry  
461 distributions for a range of input IPTG concentrations to the following Hill function

$$462 \quad y = y_{\min} + (y_{\max} - y_{\min}) \frac{x^n}{K^n + x^n}. \quad (9)$$

463 Here,  $y$  is the output GFP fluorescence in MEFL units,  $y_{\min}$  and  $y_{\max}$  are the minimum and  
464 maximum output GFP fluorescence in MEFL units, respectively,  $K$  is the input IPTG  
465 concentration at which the output is half-maximal,  $n$  is the Hill coefficient, and  $x$  is the input  
466 IPTG concentration. Fitting of the experimental data was performed using non-linear least  
467 squares and the curve\_fit function from the SciPy.integrate package version 1.1. Genetic  
468 diagrams were generated using DNAplotlib version 1.0 (Bartoli et al., 2018; Der et al., 2017)  
469 and figures were composed using Omnigraffle version 7.15 and Affinity Designer version  
470 1.8.3.

471

#### 472 **Data availability**

473 Python scripts simulating the ODE models of the direct and multi-level controllers be found in  
474 **Supplementary Data 1**. Annotated sequences for all plasmids in GenBank format are  
475 available in **Supplementary Data 2**. All plasmids are available from Addgene.

476

#### 477 **Acknowledgements**

478 This work was supported by BrisSynBio, a BBSRC/EPSRC Synthetic Biology Research  
479 Centre grant BB/L01386X/1 (T.E.G., C.S.G.), a Royal Society PhD Studentship (F.V.G.), and  
480 a Royal Society University Research Fellowship grant UF160357 (T.E.G.)

481

#### 482 **Author Contributions**

483 T.E.G. conceived the study. V.G. performed all experiments. T.E.G. developed and simulated  
484 the mathematical models. V.G. and T.E.G. analysed the data. T.E.G. and C.S.G. supervised  
485 the work. All authors helped to write the manuscript.

486

487 **Competing Interests**

488 The authors declare no competing interests.



489 **References**

490 Bartoli, V., Dixon, D.O.R., and Goroehowski, T.E. (2018). Automated Visualization of Genetic  
491 Designs Using DNAPlotlib. In *Synthetic Biology: Methods and Protocols*, J.C. Braman, ed.  
492 (New York, NY: Springer New York), pp. 399–409.

493 Bartoli, V., Meaker, G.A., di Bernardo, M., and Goroehowski, T.E. (2020). Tunable genetic  
494 devices through simultaneous control of transcription and translation. *Nat. Commun.* *11*, 2095.

495 Baumschlager, A., Aoki, S.K., and Khammash, M. (2017). Dynamic Blue Light-Inducible T7  
496 RNA Polymerases (Opto-T7RNAPs) for Precise Spatiotemporal Gene Expression Control.  
497 *ACS Synth. Biol.* *6*, 2157–2167.

498 Beal, J. (2015). Signal-to-Noise Ratio Measures Efficacy of Biological Computing Devices and  
499 Circuits. *Front. Bioeng. Biotechnol.* *3*, 93.

500 de Boer, H.A., Comstock, L.J., and Vasser, M. (1983). The tac promoter: a functional hybrid  
501 derived from the trp and lac promoters. *Proc. Natl. Acad. Sci.* *80*, 21.

502 Boo, A., Ellis, T., and Stan, G.-B. (2019). Host-aware synthetic biology. *Synth. Biol.* *14*, 66–  
503 72.

504 Cameron, D.E., and Collins, J.J. (2014). Tunable protein degradation in bacteria. *Nat.*  
505 *Biotechnol.* *32*, 1276–1281.

506 Castillo-Hair, S.M., Sexton, J.T., Landry, B.P., Olson, E.J., Igoshin, O.A., and Tabor, J.J.  
507 (2016). FlowCal: A User-Friendly, Open Source Software Tool for Automatically Converting  
508 Flow Cytometry Data from Arbitrary to Calibrated Units. *ACS Synth. Biol.* *5*, 774–780.

509 Castillo-Hair, S.M., Baerman, E.A., Fujita, M., Igoshin, O.A., and Tabor, J.J. (2019).  
510 Optogenetic control of *Bacillus subtilis* gene expression. *Nat. Commun.* *10*, 3099.

511 Ceroni, F., Algar, R., Stan, G.-B., and Ellis, T. (2015). Quantifying cellular capacity identifies  
512 gene expression designs with reduced burden. *Nat. Methods* *12*, 415–418.

513 Ceroni, F., Boo, A., Furini, S., Goroehowski, T.E., Borkowski, O., Ladak, Y.N., Awan, A.R.,  
514 Gilbert, C., Stan, G.-B., and Ellis, T. (2018). Burden-driven feedback control of gene  
515 expression. *Nat. Methods* *15*, 387–393.

516 Chappell, J., Takahashi, M.K., and Lucks, J.B. (2015). Creating small transcription activating  
517 RNAs. *Nat. Chem. Biol.* *11*, 214–220.

- 518 Chappell, J., Westbrook, A., Verosloff, M., and Lucks, J.B. (2017). Computational design of  
519 small transcription activating RNAs for versatile and dynamic gene regulation. *Nat. Commun.*  
520 *8*, 1051.
- 521 Deng, D., Yan, C., Wu, J., Pan, X., and Yan, N. (2014). Revisiting the TALE repeat. *Protein*  
522 *Cell* *5*, 297–306.
- 523 Der, B.S., Glassey, E., Bartley, B.A., Enghuus, C., Goodman, D.B., Gordon, D.B., Voigt, C.A.,  
524 and Gorochofski, T.E. (2017). DNAplotlib: Programmable Visualization of Genetic Designs  
525 and Associated Data. *ACS Synth. Biol.* *6*, 1115–1119.
- 526 Elowitz, M.B., Levine, A.J., Siggia, E.D., and Swain, P.S. (2002). Stochastic Gene Expression  
527 in a Single Cell. *Science* *297*, 1183.
- 528 Engler, C., Gruetzner, R., Kandzia, R., and Marillonnet, S. (2009). Golden Gate Shuffling: A  
529 One-Pot DNA Shuffling Method Based on Type IIs Restriction Enzymes. *PLOS ONE* *4*, e5553.
- 530 Gallivan, J.P. (2007). Toward reprogramming bacteria with small molecules and RNA. *Curr.*  
531 *Opin. Chem. Biol.* *11*, 612–619.
- 532 Gilbert, L.A., Horlbeck, M.A., Adamson, B., Villalta, J.E., Chen, Y., Whitehead, E.H.,  
533 Guimaraes, C., Panning, B., Ploegh, H.L., Bassik, M.C., et al. (2014). Genome-Scale  
534 CRISPR-Mediated Control of Gene Repression and Activation. *Cell* *159*, 647–661.
- 535 Golding, I., Paulsson, J., Zawilski, S.M., and Cox, E.C. (2005). Real-Time Kinetics of Gene  
536 Activity in Individual Bacteria. *Cell* *123*, 1025–1036.
- 537 Gomes, L., Monteiro, G., and Mergulhão, F. (2020). The Impact of IPTG Induction on Plasmid  
538 Stability and Heterologous Protein Expression by *Escherichia coli* Biofilms. *Int. J. Mol. Sci.* *21*.
- 539 Gorochofski, T.E., van den Berg, E., Kerkman, R., Roubos, J.A., and Bovenberg, R.A.L.  
540 (2014). Using Synthetic Biological Parts and Microbioreactors to Explore the Protein  
541 Expression Characteristics of *Escherichia coli*. *ACS Synth. Biol.* *3*, 129–139.
- 542 Gorochofski, T.E., Avcilar-Kucukgoze, I., Bovenberg, R.A.L., Roubos, J.A., and Ignatova, Z.  
543 (2016). A Minimal Model of Ribosome Allocation Dynamics Captures Trade-offs in Expression  
544 between Endogenous and Synthetic Genes. *ACS Synth. Biol.* *5*, 710–720.
- 545 Gorochofski, T.E., Grierson, C.S., and di Bernardo, M. (2018). Organization of feed-forward  
546 loop motifs reveals architectural principles in natural and engineered networks. *Sci. Adv.* *4*,  
547 eaap9751.

- 548 Gottesman, S. (2005). Micros for microbes: non-coding regulatory RNAs in bacteria. Trends  
549 Genet. 21, 399–404.
- 550 Green, A.A., Silver, P.A., Collins, J.J., and Yin, P. (2014). Toehold Switches: De-Novo-  
551 Designed Regulators of Gene Expression. Cell 159, 925–939.
- 552 Green, A.A., Kim, J., Ma, D., Silver, P.A., Collins, J.J., and Yin, P. (2017). Complex cellular  
553 logic computation using ribocomputing devices. Nature 548, 117.
- 554 Gyorgy, A., Jiménez, J.I., Yazbek, J., Huang, H.-H., Chung, H., Weiss, R., and Del Vecchio,  
555 D. (2015). Isocost Lines Describe the Cellular Economy of Genetic Circuits. Biophys. J. 109,  
556 639–646.
- 557 Kelly, C.L., Harris, A.W.K., Steel, H., Hancock, E.J., Heap, J.T., and Papachristodoulou, A.  
558 (2018). Synthetic negative feedback circuits using engineered small RNAs. Nucleic Acids Res.  
559 46, 9875–9889.
- 560 Khalil, A.S., Lu, T.K., Bashor, C.J., Ramirez, C.L., Pyenson, N.C., Joung, J.K., and Collins,  
561 J.J. (2012). A Synthetic Biology Framework for Programming Eukaryotic Transcription  
562 Functions. Cell 150, 647–658.
- 563 Malakar, P., and Venkatesh, K.V. (2012). Effect of substrate and IPTG concentrations on the  
564 burden to growth of Escherichia coli on glycerol due to the expression of Lac proteins. Appl.  
565 Microbiol. Biotechnol. 93, 2543–2549.
- 566 Mangan, S., and Alon, U. (2003). Structure and function of the feed-forward loop network  
567 motif. Proc. Natl. Acad. Sci. 100, 11980.
- 568 Meyer, A.J., Segall-Shapiro, T.H., Glassey, E., Zhang, J., and Voigt, C.A. (2019). Escherichia  
569 coli “Marionette” strains with 12 highly optimized small-molecule sensors. Nat. Chem. Biol. 15,  
570 196–204.
- 571 Milo, R., Shen-Orr, S., Itzkovitz, S., Kashtan, N., Chklovskii, D., and Alon, U. (2002). Network  
572 Motifs: Simple Building Blocks of Complex Networks. Science 298, 824.
- 573 Nielsen, A.A.K., Der, B.S., Shin, J., Vaidyanathan, P., Paralanov, V., Strychalski, E.A., Ross,  
574 D., Densmore, D., and Voigt, C.A. (2016). Genetic circuit design automation. Science 352,  
575 aac7341.

- 576 Olson, E.J., Hartsough, L.A., Landry, B.P., Shroff, R., and Tabor, J.J. (2014). Characterizing  
577 bacterial gene circuit dynamics with optically programmed gene expression signals. *Nat.*  
578 *Methods* *11*, 449–455.
- 579 Raj, A., and van Oudenaarden, A. (2008). Nature, Nurture, or Chance: Stochastic Gene  
580 Expression and Its Consequences. *Cell* *135*, 216–226.
- 581 Rosano, G.L., and Ceccarelli, E.A. (2014). Recombinant protein expression in *Escherichia*  
582 *coli*: advances and challenges. *Front. Microbiol.* *5*, 172.
- 583 S. Dunn, H. Kugler, and B. Yordanov (2019). Formal Analysis of Network Motifs Links  
584 Structure to Function in Biological Programs. *IEEE/ACM Trans. Comput. Biol. Bioinform.* 1–1.
- 585 Sen, S., Apurva, D., Satija, R., Siegal, D., and Murray, R.M. (2017). Design of a Toolbox of  
586 RNA Thermometers. *ACS Synth. Biol.* *6*, 1461–1470.
- 587 Sivashanmugam, A., Murray, V., Cui, C., Zhang, Y., Wang, J., and Li, Q. (2009). Practical  
588 protocols for production of very high yields of recombinant proteins using *Escherichia coli*.  
589 *Protein Sci.* *18*, 936–948.
- 590 Soper, T., Mandin, P., Majdalani, N., Gottesman, S., and Woodson, S.A. (2010). Positive  
591 regulation by small RNAs and the role of Hfq. *Proc. Natl. Acad. Sci.* *107*, 9602.
- 592 Storz, G., Opdyke, J.A., and Zhang, A. (2004). Controlling mRNA stability and translation with  
593 small, noncoding RNAs. *Curr. Opin. Microbiol.* *7*, 140–144.
- 594 Süel, G.M., Garcia-Ojalvo, J., Liberman, L.M., and Elowitz, M.B. (2006). An excitable gene  
595 regulatory circuit induces transient cellular differentiation. *Nature* *440*, 545–550.
- 596 Waters, L.S., and Storz, G. (2009). Regulatory RNAs in Bacteria. *Cell* *136*, 615–628.
- 597 Weiße, A.Y., Oyarzún, D.A., Danos, V., and Swain, P.S. (2015). Mechanistic links between  
598 cellular trade-offs, gene expression, and growth. *Proc. Natl. Acad. Sci.* *112*, E1038.
- 599 Westbrook, A.M., and Lucks, J.B. (2017). Achieving large dynamic range control of gene  
600 expression with a compact RNA transcription–translation regulator. *Nucleic Acids Res.* *45*,  
601 5614–5624.
- 602 Woodruff, L.B.A., Goroehowski, T.E., Roehner, N., Mikkelsen, T.S., Densmore, D., Gordon,  
603 D.B., Nicol, R., and Voigt, C.A. (2016). Registry in a tube: multiplexed pools of retrievable  
604 parts for genetic design space exploration. *Nucleic Acids Res.* *45*, 1553–1565.

605 **Tables**

606 **Table 1: Performance summary of the single- and multi-level controllers<sup>a</sup>**

| Controller             | Type <sup>b</sup> | Dynamic range <sup>c</sup><br>(10 <sup>3</sup> MEFL) | Fold<br>change <sup>c</sup> | Cooperativity <sup>d</sup> ,<br><i>n</i> | Signal to Noise<br>Ratio (dB) |
|------------------------|-------------------|------------------------------------------------------|-----------------------------|------------------------------------------|-------------------------------|
| <i>P<sub>tac</sub></i> | SLC               | 0.9                                                  | 93                          | 3.4                                      | 0.2                           |
| THS                    | MLC               | 65.5                                                 | 2166                        | 7.3                                      | 10.1                          |
| STAR                   | MLC               | 4.6                                                  | 53                          | 9.3                                      | 4.7                           |
| STAR <sub>2</sub>      | MLC               | 3.4                                                  | 37                          | 7.7                                      | 4.5                           |
| DC                     | MLC               | 10.4                                                 | 1030                        | 3.4                                      | 7.1                           |

- 607 a. All values are averages calculated from three biological replicates.  
608 b. SLC refers to 'single-level controller' and MLC refers to 'multi-level controller'.  
609 c. Calculated between 'on' and 'off' states for cells grown in 0 and 1 mM IPTG, respectively, and  
610 given in calibrated molecules of equivalent fluorescein (MEFL) units.  
611 d. From the Hill function fitting of the steady state response functions (**Figure 4A; Supplementary**  
612 **Figure 2**).

613 **Figures and captions**

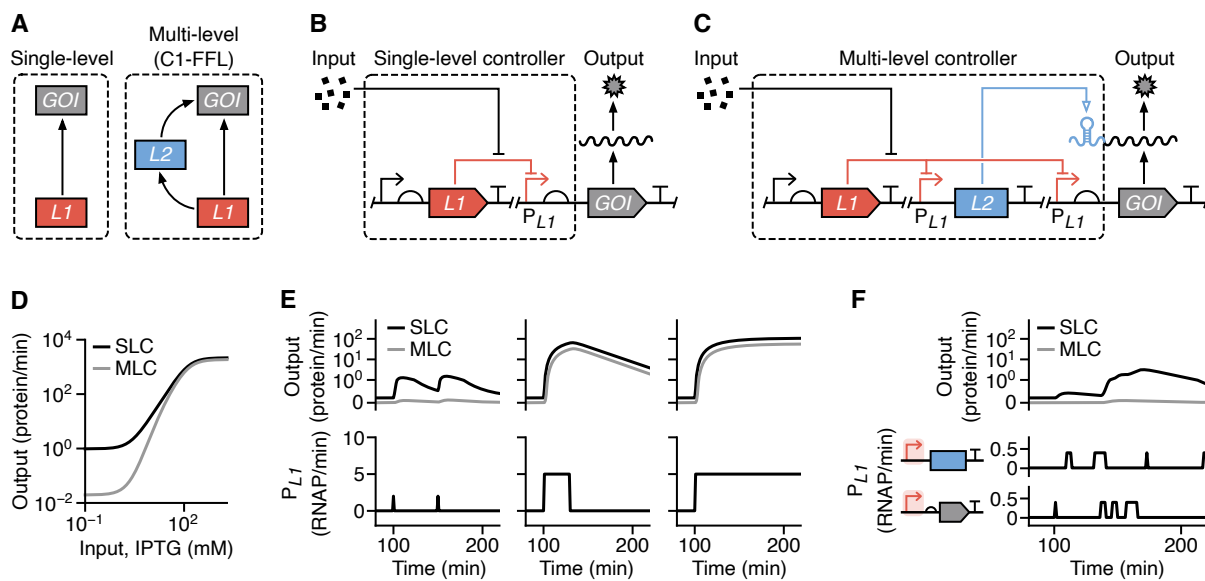

614

615 **Figure 1: Stringent control of protein expression through multi-level gene regulation.**

616 **(A)** Two possible regulatory schemes to control the expression of a gene of interest (*GOI*): 1.

617 control using a single regulator (*L1*), and 2. multi-level control using two separate regulators

618 (*L1* and *L2*) connected in the form of a coherent type 1 feed-forward loop (C1-FFL). **(B)**

619 Schematic of a genetic implementation of a single-level controller (SLC) that uses only

620 transcriptional (red lines) regulation. An input (e.g. small molecule) modulates activity of the

621  $P_{L1}$  promoter and production of the *GOI*. **(C)** Schematic of a genetic implementation of a multi-

622 level controller (MLC) that uses both transcriptional (red lines) and translational (blue line)

623 regulation. An input (e.g. small molecule) modulates activity of the two  $P_{L1}$  promoters and an

624 internal *L2* regulator activates the translation of *GOI* transcripts to finally produce the output

625 protein. **(D)** Steady state response functions from mathematical models of the SLC and MLC.

626 **(E)** Dynamic model simulations of the SLC and MLC and their response to different forms of

627 temporal input (left to right): short pulses ( $P_{L1}$  activity = 2 RNAP/min for 1 min at 100 min and

628 150 min), square wave ( $P_{L1}$  activity = 5 RNAP/min from 100–130 min), and a step function

629 ( $P_{L1}$  activity = 5 RNAP/min from 100 min onwards). The activity of both  $P_{L1}$  promoters in the

630 MLC is considered identical. **(F)** Dynamic model simulations of the SLC and MLC showing

631 suppression of intrinsic promoter noise by the MLC. The two identical  $P_{L1}$  promoters for the

632 *L2* regulator and *GOI* are separately driven by independent and biologically realistic bursty

633 transcriptional activity profiles (**Methods**).

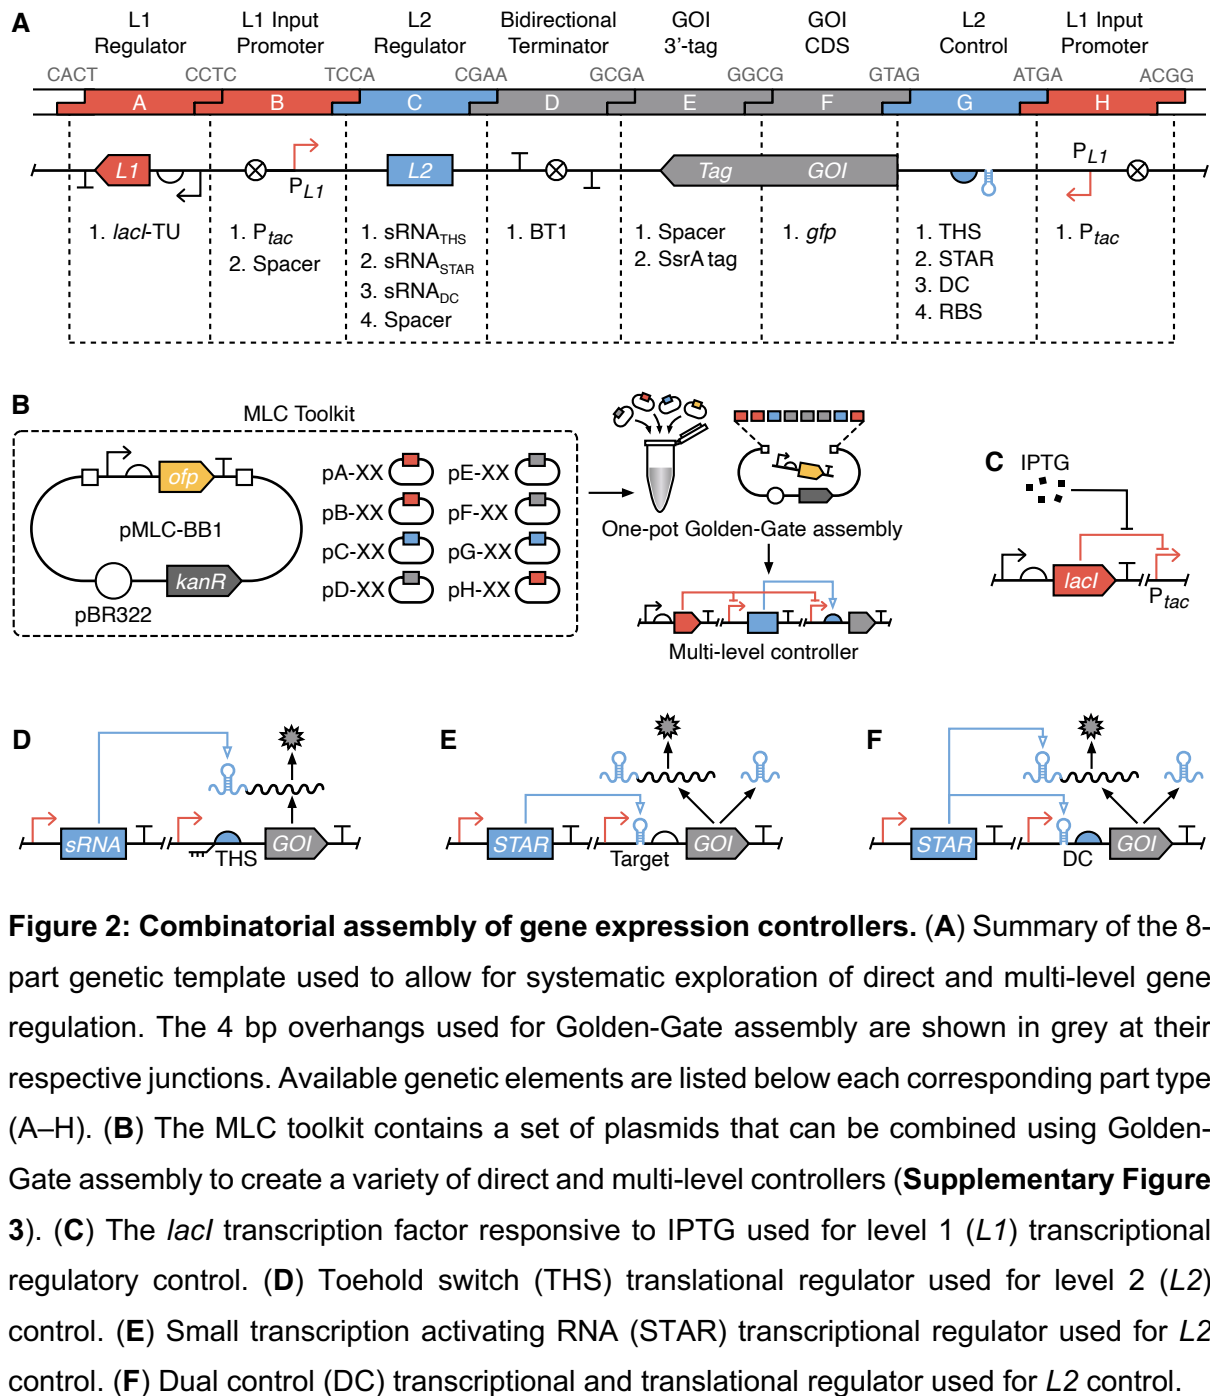

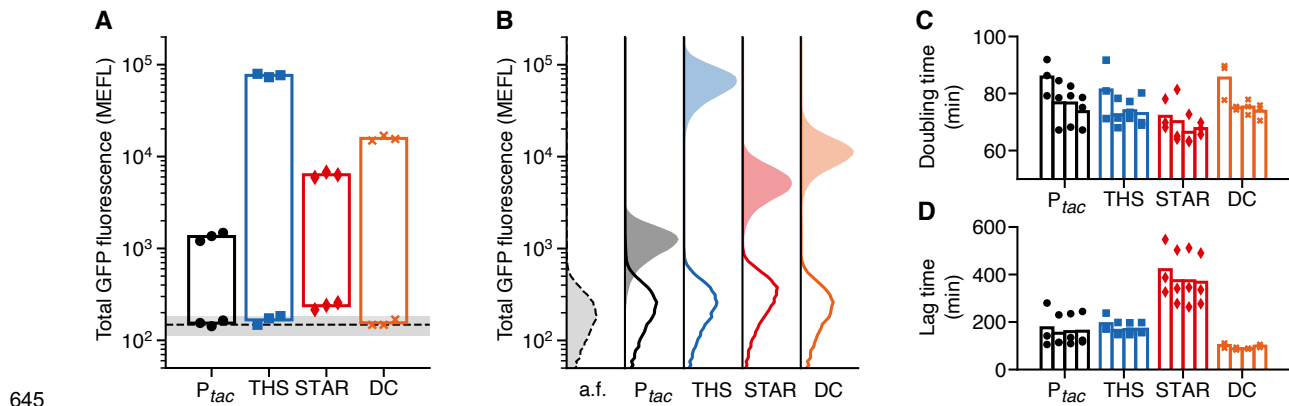

645

646

647

648

649

650

651

652

653

654

655

656

657

658

**Figure 3: Performance comparison of single- and multi-level controllers. (A)** Total GFP fluorescence for 'off' and 'on' input states (0 and 1 mM IPTG, respectively). Points show the three biological replicates for each controller and condition (black circles,  $P_{tac}$ ; blue squares, THS; red diamonds, STAR; orange crosses, DC). Black dashed line denotes the mean fluorescence of cell autofluorescence (a.f.) controls containing no plasmid with grey shaded region showing  $\pm 1$  standard deviation of 11 biological replicates. Fluorescence given in calibrated molecules of equivalent fluorescein (MEFL) units. **(B)** Flow cytometry distributions of total GFP fluorescence for 'off' (line) and 'on' (shaded) input states. Cell autofluorescence (a.f.) controls containing no controller are shown by black dashed line and light grey filled distributions. **(C)** Doubling time of cells harbouring direct and multi-level controllers for varying concentrations of IPTG (bars left to right for each design: 0, 0.1, 1, 10 mM IPTG). **(D)** Lag time calculated as the time to reach an  $OD_{600} = 0.15$  after inoculation of cells harbouring controllers for varying concentrations of IPTG (bars left to right for each design: 0, 0.1, 1, 10 mM IPTG).



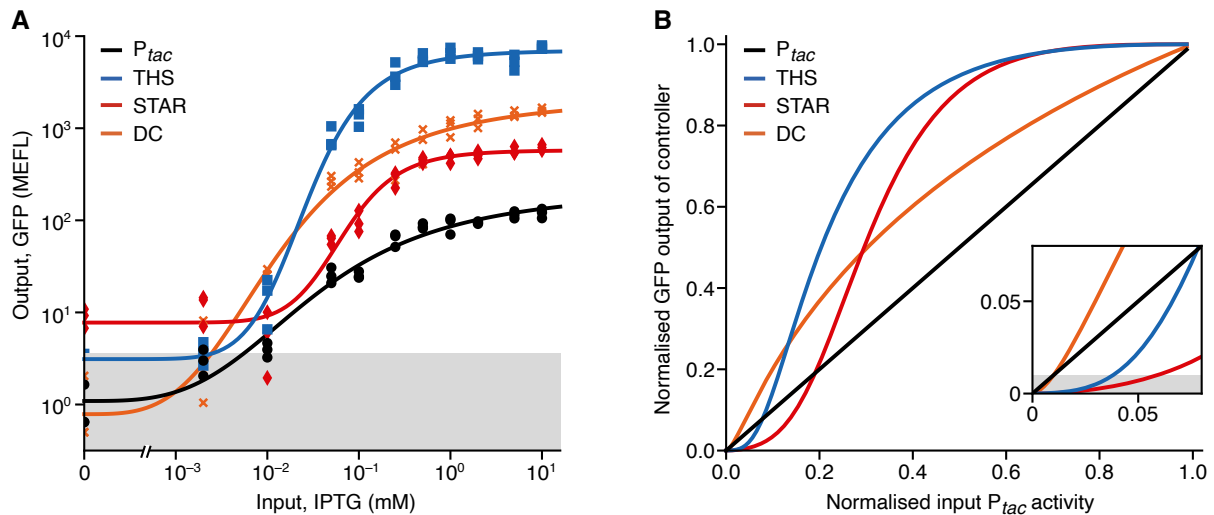

659

660 **Figure 4: Response functions of single- and multi-level controllers.** (A) Steady state  
661 response functions of the controllers showing output GFP fluorescence (corrected for cell  
662 autofluorescence) for varying input IPTG concentrations (0, 0.002, 0.01, 0.05, 0.1, 0.25, 0.5,  
663 1, 2, 5, 10 mM). Points show the three biological replicates for each controller and condition  
664 (black circles, P<sub>tac</sub>; blue squares, THS; red diamonds, STAR; orange crosses, DC). Grey  
665 shaded region shows the standard deviation of cellular GFP autofluorescence from 11  
666 biological replicates. (B) Comparison of how normalised GFP output (as a fraction of the  
667 maximum GFP fluorescence) varies in response to changes in the normalised transcriptional  
668 activity of P<sub>tac</sub> (as a fraction of its maximum activity). Multi-level regulation can lead to the  
669 suppression or amplification of the output GFP production rate compared to direct  
670 transcriptional regulation (i.e. a specific multi-level controller's line falls below or above the  
671 diagonal, respectively). Insert shows zoomed area and grey shaded region denotes a GFP  
672 output level of 1% for the controller.
